# Supplementary material for: How Does the Environment Affect Wheat Yield and Protein Content Response to Drought? A Meta-Analysis
Source: Front Plant Sci. 2022 Jun 30;13:896985. doi: 10.3389/fpls.2022.896985 (PMC9280411; doi:10.3389/fpls.2022.896985)
Supplement: Supplementary file 1 [file Table_1.xlsx]

## Sheet: Sheet1
Reference	Continent	Country	location	Coordinates	Wheat type	Year	Temperature	Precipitation	Soil organic matter	Soil type	Rooting	N _app	droughht type	GY_CK	GY_Drought	GPY_CK	GPY_Drought	GPC_CK	GPC_Drought	GNC_CK	GNC_Drought
Abdelmotagally, F. M., & Elzohri, M. (2016). Improvement of wheat yield grown under drought stress by boron foliar application at different growth stages. Journal of the Saudi Society of Agricultural Sciences, 17(2), 178-185.	Africa	Egypt	Assiut	27°N,31°E		2013-2014			0.97	sandy	field	238.06	CD	4380.29	3142.38
Abdelmotagally, F. M., & Elzohri, M. (2016). Improvement of wheat yield grown under drought stress by boron foliar application at different growth stages. Journal of the Saudi Society of Agricultural Sciences, 17(2), 178-185.	Africa	Egypt	Assiut	27°N,31°E		2014-2015			0.97	sandy	field	238.06	CD	4356.48	3285.22
Lacerenza, N. G., Cattivelli, L., & Fonzo, N. D. (1995). Expression of Drought Induced Genes in Durum Wheat Under Stress in Field Conditions. Journal of Plant Physiology,, 169-172.	Europe	Italy	Foggia	41°N,15°E		1992	21.5708	288.744			field	52	TD	4900	3700
Hernandezespinosa, N., Mondal, S., Autrique, E., Gonzalezsantoyo, H., Crossa, J., Huertaespino, J., ... & Guzman, C. (2018). Milling, processing and end-use quality traits of CIMMYT spring bread wheat germplasm under drought and heat stress. Field Crops Research,, 104-112.	North America	Mexico	Ciudad Obregón	14°N,89°W		2012-2013					field	200	CD					12.09	15.06	2.12105	2.64211
Hernandezespinosa, N., Mondal, S., Autrique, E., Gonzalezsantoyo, H., Crossa, J., Huertaespino, J., ... & Guzman, C. (2018). Milling, processing and end-use quality traits of CIMMYT spring bread wheat germplasm under drought and heat stress. Field Crops Research,, 104-112.	North America	Mexico	Ciudad Obregón	14°N,89°W		2013-2014					field	200	CD					12.09	13.75	2.12105	2.41228
Nawaz, F., Ahmad, R., Ashraf, M. Y., Waraich, E. A., & Khan, S. Z. (2015). Effect of selenium foliar spray on physiological and biochemical processes and chemical constituents of wheat under drought stress. Ecotoxicology and Environmental Safety,, 191-200.	Asia	Pakistan	Faisalabad	31°N,73°E					27	loam	field	110	CD	3150	1875
Silva, A. D., Ramos, M. L., Junior, W. Q., De Alencar, E. R., Silva, P. C., De Lima, C. A., & Silva, M. A. (2020). Water stress alters physical and chemical quality in grains of common bean, triticale and wheat. Agricultural Water Management,.	South America	Brazil	Planaltina	15°35′30″S, 47°42′30″W		2017	14.33	60.92	26	clay	field	100	CD	4026.3	1456.43	653.468	232.009	16.23	15.93	2.89821	2.84464
Silva, A. D., Ramos, M. L., Junior, W. Q., De Alencar, E. R., Silva, P. C., De Lima, C. A., & Silva, M. A. (2020). Water stress alters physical and chemical quality in grains of common bean, triticale and wheat. Agricultural Water Management,.	South America	Brazil	Planaltina	15°35′30″S, 47°42′30″W		2017	14.33	60.92	26	clay	field	100	CD	3639.22	1186.83	568.082	200.693	15.61	16.91	2.7875	3.01964
Sadras, V. O. (2002). Interaction between rainfall and nitrogen fertilisation of wheat in environments prone to terminal drought: economic and environmental risk analysis. Field Crops Research, 77(2), 201-215.	Australia	Australia	Renmark	34°10′ S, 140°44′E		1998-2000	8.5	260	6	loam	field	5	CD	1770	910
Sadras, V. O. (2002). Interaction between rainfall and nitrogen fertilisation of wheat in environments prone to terminal drought: economic and environmental risk analysis. Field Crops Research, 77(2), 201-215.	Australia	Australia	Renmark	34°10′ S, 140°44′E		1998-2000	8.5	260	6	loam	field	5	CD	2290	1690
Sadras, V. O. (2002). Interaction between rainfall and nitrogen fertilisation of wheat in environments prone to terminal drought: economic and environmental risk analysis. Field Crops Research, 77(2), 201-215.	Australia	Australia	Renmark	34°10′ S, 140°44′E		1998-2000	8.5	260	6	loam	field	5	CD	2410	2180
Sadras, V. O. (2002). Interaction between rainfall and nitrogen fertilisation of wheat in environments prone to terminal drought: economic and environmental risk analysis. Field Crops Research, 77(2), 201-215.	Australia	Australia	Wentworth	34°07′S, 141°55′ E		1998-2000	8.2	296	6	loam	field	35	CD	1590	710
Sadras, V. O. (2002). Interaction between rainfall and nitrogen fertilisation of wheat in environments prone to terminal drought: economic and environmental risk analysis. Field Crops Research, 77(2), 201-215.	Australia	Australia	Wentworth	34°07′S, 141°55′ E		1998-2000	8.2	296	6	loam	field	35	CD	2420	1320
Sadras, V. O. (2002). Interaction between rainfall and nitrogen fertilisation of wheat in environments prone to terminal drought: economic and environmental risk analysis. Field Crops Research, 77(2), 201-215.	Australia	Australia	Wentworth	34°07′S, 141°55′ E		1998-2000	8.2	296	6	loam	field	35	CD	3010	2370
Sadras, V. O. (2002). Interaction between rainfall and nitrogen fertilisation of wheat in environments prone to terminal drought: economic and environmental risk analysis. Field Crops Research, 77(2), 201-215.	Australia	Australia	Murray Bridge	35°07′ S,139°16′ E		1998-2000	7.9	353	6	loam	field	55	CD	1500	690
Sadras, V. O. (2002). Interaction between rainfall and nitrogen fertilisation of wheat in environments prone to terminal drought: economic and environmental risk analysis. Field Crops Research, 77(2), 201-215.	Australia	Australia	Murray Bridge	35°07′ S,139°16′ E		1998-2000	7.9	353	6	loam	field	55	CD	2330	1120
Sadras, V. O. (2002). Interaction between rainfall and nitrogen fertilisation of wheat in environments prone to terminal drought: economic and environmental risk analysis. Field Crops Research, 77(2), 201-215.	Australia	Australia	Murray Bridge	35°07′ S,139°16′ E		1998-2000	7.9	353	6	loam	field	55	CD	3400	2120
C. Saint Pierre（文件Pierre, C. S. , Peterson, C. J. , Ross, A. S. , Ohm, J. B. , Verhoeven, M. C. , & Larson, M. , et al. (2008). Winter wheat genotypes under different levels of nitrogen and water stress: changes in grain protein composition. Journal of Cereal ence, 47(3), 407-416.丢失）	North America	United States	Hermiston	45°49′ N,119°17′W	winter	2002-2003	12.51	192			field	170	CD					10.16	10.98	1.78246	1.92632
Weightman, R. M., Millar, S., Alava, J., Foulkes, M. J., Fish, L., & Snape, J. W. (2008). Effects of drought and the presence of the 1BL/1RS translocation on grain vitreosity, hardness and protein content in winter wheat. Journal of Cereal Science, 47(3), 457-468.	Europe	United Kingdom	Nottinghamshire	53° S, 1°E		2001-2002				loam	field	220	CD					12.8	15	2.24561	2.63158
Weightman, R. M., Millar, S., Alava, J., Foulkes, M. J., Fish, L., & Snape, J. W. (2008). Effects of drought and the presence of the 1BL/1RS translocation on grain vitreosity, hardness and protein content in winter wheat. Journal of Cereal Science, 47(3), 457-468.	Europe	United Kingdom	Nottinghamshire	53° S, 1°E		2001-2002				loam	field	220	CD					12	14.2	2.10526	2.49123
Weightman, R. M., Millar, S., Alava, J., Foulkes, M. J., Fish, L., & Snape, J. W. (2008). Effects of drought and the presence of the 1BL/1RS translocation on grain vitreosity, hardness and protein content in winter wheat. Journal of Cereal Science, 47(3), 457-468.	Europe	United Kingdom	Nottinghamshire	53° S, 1°E		2001-2002				loam	field	220	CD					12.7	13.4	2.22807	2.35088
Weightman, R. M., Millar, S., Alava, J., Foulkes, M. J., Fish, L., & Snape, J. W. (2008). Effects of drought and the presence of the 1BL/1RS translocation on grain vitreosity, hardness and protein content in winter wheat. Journal of Cereal Science, 47(3), 457-468.	Europe	United Kingdom	Nottinghamshire	53° S, 1°E		2001-2002				loam	field	220	CD					12.7	13.7	2.22807	2.40351
Weightman, R. M., Millar, S., Alava, J., Foulkes, M. J., Fish, L., & Snape, J. W. (2008). Effects of drought and the presence of the 1BL/1RS translocation on grain vitreosity, hardness and protein content in winter wheat. Journal of Cereal Science, 47(3), 457-468.	Europe	United Kingdom	Nottinghamshire	53° S, 1°E		2001-2002				loam	field	220	CD					11.9	13.8	2.08772	2.42105
Weightman, R. M., Millar, S., Alava, J., Foulkes, M. J., Fish, L., & Snape, J. W. (2008). Effects of drought and the presence of the 1BL/1RS translocation on grain vitreosity, hardness and protein content in winter wheat. Journal of Cereal Science, 47(3), 457-468.	Europe	United Kingdom	Nottinghamshire	53° S, 1°E		2002-2003				loam	field	220	CD					12.5	13.4	2.19298	2.35088
Weightman, R. M., Millar, S., Alava, J., Foulkes, M. J., Fish, L., & Snape, J. W. (2008). Effects of drought and the presence of the 1BL/1RS translocation on grain vitreosity, hardness and protein content in winter wheat. Journal of Cereal Science, 47(3), 457-468.	Europe	United Kingdom	Nottinghamshire	53° S, 1°E		2002-2003				loam	field	220	CD					12.9	15.1	2.26316	2.64912
Weightman, R. M., Millar, S., Alava, J., Foulkes, M. J., Fish, L., & Snape, J. W. (2008). Effects of drought and the presence of the 1BL/1RS translocation on grain vitreosity, hardness and protein content in winter wheat. Journal of Cereal Science, 47(3), 457-468.	Europe	United Kingdom	Nottinghamshire	53° S, 1°E		2002-2003				loam	field	220	CD					12.8	14.8	2.24561	2.59649
Weightman, R. M., Millar, S., Alava, J., Foulkes, M. J., Fish, L., & Snape, J. W. (2008). Effects of drought and the presence of the 1BL/1RS translocation on grain vitreosity, hardness and protein content in winter wheat. Journal of Cereal Science, 47(3), 457-468.	Europe	United Kingdom	Nottinghamshire	53° S, 1°E		2002-2003				loam	field	220	CD					12.9	13.8	2.26316	2.42105
Weightman, R. M., Millar, S., Alava, J., Foulkes, M. J., Fish, L., & Snape, J. W. (2008). Effects of drought and the presence of the 1BL/1RS translocation on grain vitreosity, hardness and protein content in winter wheat. Journal of Cereal Science, 47(3), 457-468.	Europe	United Kingdom	Nottinghamshire	53° S, 1°E		2002-2003				loam	field	220	CD					12.7	13.6	2.22807	2.38596
Li, Y., Wu, Y., Hernandezespinosa, N., & Pena, R. J. (2013). The influence of drought and heat stress on the expression of end-use quality parameters of common wheat. Journal of Cereal Science, 57(1), 73-78.	North America	Mexico	Sonora	27°29′21″ N,109°56′06″W		2009-2010					field	200	CD	6542	3628	837.376	468.012	12.8	12.9	2.24561	2.26316
Li, Y., Wu, Y., Hernandezespinosa, N., & Pena, R. J. (2013). Heat and drought stress on durum wheat: Responses of genotypes, yield, and quality parameters. Journal of Cereal Science, 57(3), 398-404.	North America	Mexico	Sonora	27°29′21″ N,109°56′06″W		2008-2009					field	200	CD	6754	3307	869.915	439.831	12.88	13.3	2.25965	2.33333
Li, Y., Wu, Y., Hernandezespinosa, N., & Pena, R. J. (2013). Heat and drought stress on durum wheat: Responses of genotypes, yield, and quality parameters. Journal of Cereal Science, 57(3), 398-404.	North America	Mexico	Sonora	27°29′21″ N,109°56′06″W		2009-2010					field	200	CD	7295	3874	883.424	460.231	12.11	11.88	2.12456	2.08421
Velu, G., Guzman, C., Mondal, S., Autrique, J. E., Huerta, J., & Singh, R. P. (2016). Effect of drought and elevated temperature on grain zinc and iron concentrations in CIMMYT spring wheat. Journal of Cereal Science,, 182-186.	North America	Mexico	Sonora	27°29′21″ N,109°56′06″W	spring	2012-2013					field	200	CD					14.13	15.17	2.47895	2.6614
Velu, G., Guzman, C., Mondal, S., Autrique, J. E., Huerta, J., & Singh, R. P. (2016). Effect of drought and elevated temperature on grain zinc and iron concentrations in CIMMYT spring wheat. Journal of Cereal Science,, 182-186.	North America	Mexico	Sonora	27°29′21″ N,109°56′06″W	spring	2013-2014					field	200	CD					13.43	14.71	2.35614	2.5807
Tabassum, T., Farooq, M., Ahmad, R., Zohaib, A., & Wahid, A. (2017). Seed priming and transgenerational drought memory improves tolerance against salt stress in bread wheat.. Plant Physiology and Biochemistry,, 362-369.	Asia	Pakistan	University of Agriculture Faisalabad	31°N, 73°E		2011-2012			9.2	loam	field	100	TD					12.24	14.97	2.14737	2.62632
Barutcular, C. , Yildirim, M. , Koc, M. , Dizlek, H. , & Tanrikulu, A. . (2016). Quality traits performance of bread wheat genotypes under drought and heat stress conditions. Fresenius Environmental Bulletin, 25(12), 6159-6165.	Asia	Turkey	Dicle University	37°53'N, 40°16'E	spring	2011-2012	9.1	235.2			field	160	CD					15.2	18.1	2.66667	3.17544
Houshmand, S., Arzani, A., & Mirmohammadimaibody, S. A. (2014). Effects of Salinity and Drought Stress on Grain Quality of Durum Wheat. Communications in Soil Science and Plant Analysis, 45(3), 297-308.	Asia	Iran	Lavark	32°32′N，51°23′E		2012	15	140	13	loam	field	100	CD	7215	2209.87	943	318	13.07	14.39	2.29298	2.52456
Houshmand, S., Arzani, A., & Mirmohammadimaibody, S. A. (2014). Effects of Salinity and Drought Stress on Grain Quality of Durum Wheat. Communications in Soil Science and Plant Analysis, 45(3), 297-308.	Asia	Iran	Lavark	32°32′N，51°23′E		2012	15	140	13	loam	field	100	CD	6338.03	2177.15	810	322	12.78	14.79	2.24211	2.59474
Houshmand, S., Arzani, A., & Mirmohammadimaibody, S. A. (2014). Effects of Salinity and Drought Stress on Grain Quality of Durum Wheat. Communications in Soil Science and Plant Analysis, 45(3), 297-308.	Asia	Iran	Lavark	32°32′N，51°23′E		2012	15	140	13	loam	field	100	CD	2689.76	1536.95	365	235	13.57	15.29	2.3807	2.68246
Houshmand, S., Arzani, A., & Mirmohammadimaibody, S. A. (2014). Effects of Salinity and Drought Stress on Grain Quality of Durum Wheat. Communications in Soil Science and Plant Analysis, 45(3), 297-308.	Asia	Iran	Lavark	32°32′N，51°23′E		2012	15	140	13	loam	field	100	CD	6393.32	2561.14	881	377	13.78	14.72	2.41754	2.58246
Houshmand, S., Arzani, A., & Mirmohammadimaibody, S. A. (2014). Effects of Salinity and Drought Stress on Grain Quality of Durum Wheat. Communications in Soil Science and Plant Analysis, 45(3), 297-308.	Asia	Iran	Lavark	32°32′N，51°23′E		2012	15	140	13	loam	field	100	CD	5504.79	2178.29	747	303	13.57	13.91	2.3807	2.44035
Houshmand, S., Arzani, A., & Mirmohammadimaibody, S. A. (2014). Effects of Salinity and Drought Stress on Grain Quality of Durum Wheat. Communications in Soil Science and Plant Analysis, 45(3), 297-308.	Asia	Iran	Lavark	32°32′N，51°23′E		2012	15	140	13	loam	field	100	CD	4896.76	1931.82	664	289	13.56	14.96	2.37895	2.62456
Houshmand, S., Arzani, A., & Mirmohammadimaibody, S. A. (2014). Effects of Salinity and Drought Stress on Grain Quality of Durum Wheat. Communications in Soil Science and Plant Analysis, 45(3), 297-308.	Asia	Iran	Lavark	32°32′N，51°23′E		2012	15	140	13	loam	field	100	CD	4267.27	1507.13	562	222	13.17	14.73	2.31053	2.58421
Houshmand, S., Arzani, A., & Mirmohammadimaibody, S. A. (2014). Effects of Salinity and Drought Stress on Grain Quality of Durum Wheat. Communications in Soil Science and Plant Analysis, 45(3), 297-308.	Asia	Iran	Lavark	32°32′N，51°23′E		2012	15	140	13	loam	field	100	CD	4982.91	2979.43	583	449	11.7	15.07	2.05263	2.64386
Rharrabti, Y., Villegas, D., Moral, L. F., Aparicio, N., Elhani, S., & Royo, C. (2001). Environmental and genetic determination of protein content and grain yield in durum wheat under Mediterranean conditions. Plant Breeding, 120(5), 381-388.	Europe	Spain	Ebro Valley	42.5° N, 2.4°W		1998-1999		248.25	19.8	loam	field	119.25	CD	6275	3246	943.76	528.449	15.04	16.28	2.6386	2.85614
Rharrabti, Y., Villegas, D., Moral, L. F., Aparicio, N., Elhani, S., & Royo, C. (2001). Environmental and genetic determination of protein content and grain yield in durum wheat under Mediterranean conditions. Plant Breeding, 120(5), 381-388.	Europe	Spain	Andalucıá	37.5°N , 4.7°W		1998-1999		205	19.8	clay	field	77.25	CD	4262	2353	510.161	309.655	11.97	13.16	2.1	2.30877
Ozturk, A., & Aydin, F. (2004). Effect of Water Stress at Various Growth Stages on Some Quality Characteristics of Winter Wheat. Journal of Agronomy and Crop Science, 190(2), 93-99.	Asia	Turkey	Erzurum	29°55'N, 41°16'E	winter	1995-1996	10.06	279	18	loam	field	60	TD	4324	3385	457.047	388.26	10.57	11.47	1.85439	2.01228
Ozturk, A., & Aydin, F. (2004). Effect of Water Stress at Various Growth Stages on Some Quality Characteristics of Winter Wheat. Journal of Agronomy and Crop Science, 190(2), 93-99.	Asia	Turkey	Erzurum	29°55'N, 41°16'E	winter	1996-1997	9.92	385	18	loam	field	60	TD	4594	3397	475.938	380.804	10.36	11.21	1.81754	1.96667
Ozturk, A., & Aydin, F. (2004). Effect of Water Stress at Various Growth Stages on Some Quality Characteristics of Winter Wheat. Journal of Agronomy and Crop Science, 190(2), 93-99.	Asia	Turkey	Erzurum	29°55'N, 41°16'E	winter	1995-1996	10.06	279	18	loam	field	60	CD	4324	1412	457.047	177.347	10.57	12.56	1.85439	2.20351
Ozturk, A., & Aydin, F. (2004). Effect of Water Stress at Various Growth Stages on Some Quality Characteristics of Winter Wheat. Journal of Agronomy and Crop Science, 190(2), 93-99.	Asia	Turkey	Erzurum	29°55'N, 41°16'E	winter	1996-1997	9.92	385	18	loam	field	60	CD	4594	1654	475.938	201.457	10.36	12.18	1.81754	2.13684
Fan, X., Jiang, D., DAI, T., Jing,Q., Cao, W., (2005). Effects of Nitrogen Rates on Activities of Key Regulatory Enzymes for Grain Starch and Protein Accumulation in Wheat Grown Under Drought and Waterlogging from Anthesis to Maturity. Scientia Agricultura Sinica, 2005(06), 1132-1141.	Asia	China	Nanjing Agricultural University	32.02°N,1118.86°E		2001-2002			8.7		field	240	TD	56.9821	53.1661	8.61	8.48	15.11	15.95	2.65088	2.79825
Fan, X., Jiang, D., DAI, T., Jing,Q., Cao, W., (2005). Effects of Nitrogen Rates on Activities of Key Regulatory Enzymes for Grain Starch and Protein Accumulation in Wheat Grown Under Drought and Waterlogging from Anthesis to Maturity. Scientia Agricultura Sinica, 2005(06), 1132-1141.	Asia	China	Nanjing Agricultural University	32.02°N,1118.86°E		2002-2003			8.7		field	240	TD	57.4913	52.5912	8.25	8.22	14.35	15.63	2.51754	2.74211
Fan, X., Jiang, D., DAI, T., Jing,Q., Cao, W., (2005). Effects of Nitrogen Rates on Activities of Key Regulatory Enzymes for Grain Starch and Protein Accumulation in Wheat Grown Under Drought and Waterlogging from Anthesis to Maturity. Scientia Agricultura Sinica, 2005(06), 1132-1141.	Asia	China	Nanjing Agricultural University	32.02°N,1118.86°E		2001-2002			8.7		field	120	TD	41.2451	38.4276	5.3	5.23	12.85	13.61	2.25439	2.38772
Fan, X., Jiang, D., DAI, T., Jing,Q., Cao, W., (2005). Effects of Nitrogen Rates on Activities of Key Regulatory Enzymes for Grain Starch and Protein Accumulation in Wheat Grown Under Drought and Waterlogging from Anthesis to Maturity. Scientia Agricultura Sinica, 2005(06), 1132-1141.	Asia	China	Nanjing Agricultural University	32.02°N,1118.86°E		2002-2003			8.7		field	120	TD	44.1228	37.3485	5.03	4.93	11.4	13.2	2	2.31579
Duggan, B. L. , Richards, R. A. , Van Herwaarden, A. F. , & Fettell, N. A. . (2005). Agronomic evaluation of a tiller inhibition gene (tin) in wheat. i. effect on yield, yield components, and grain protein. Australian Journal of Agricultural Research, 56(2), 179-186.	Australia	Australia	Wales	151.24° N,33.92°W		1995-1997		244		loam	field	50	TD	4270	3530	482.083	387.241	10.97	11.29	1.9807	1.92456
Ping, L. , Jianli, C. , & Pute, W. . (2011). Agronomic characteristics and grain yield of 30 spring wheat genotypes under drought stress and nonstress conditions. Agronomy Journal, 103(6), 1619.	North America	United States	Aberdeen	42°57’36’’ N,112°49’12’’ W	spring	2009-2010		203-279		loam	field	158	CD	4291	1812	575.852	279.773	13.42	15.44	2.35439	2.70877
Ping, L. , Jianli, C. , & Pute, W. . (2011). Agronomic characteristics and grain yield of 30 spring wheat genotypes under drought stress and nonstress conditions. Agronomy Journal, 103(6), 1619.	North America	United States	Aberdeen	42°57’36’’ N,112°49’12’’ W	spring	2009-2010		203-279		loam	field	158	CD	7390	1987	886.8	316.132	12	15.91	2.10526	2.79123
Flagella, Z. , Giuliani, M. M. , Giuzio, L. , Volpi, C. , & Masci, S. . (2010). Influence of water deficit on durum wheat storage protein composition and technological quality. European Journal of Agronomy, 33(3), 197-207.	Europe	Italy	Foggia	41°41’N,15°54’E		2000-2001	21.5	17990.9	15		field	60	CD	4100	3100	508.4	474.3	12.4	15.3	2.17544	2.68421
Flagella, Z. , Giuliani, M. M. , Giuzio, L. , Volpi, C. , & Masci, S. . (2010). Influence of water deficit on durum wheat storage protein composition and technological quality. European Journal of Agronomy, 33(3), 197-207.	Europe	Italy	Foggia	41°41’N,15°54’E		2001-2002	21.6	7280.69	15		field	60	CD	4700	4500	667.4	711	14.2	15.8	2.49123	2.77193
Flagella, Z. , Giuliani, M. M. , Giuzio, L. , Volpi, C. , & Masci, S. . (2010). Influence of water deficit on durum wheat storage protein composition and technological quality. European Journal of Agronomy, 33(3), 197-207.	Europe	Italy	Foggia	41°41’N,15°54’E		2003-2004	25.4	100.597	15		field	60	CD	3200	3000	457.6	390	14.3	13	2.50877	2.2807
Ahmad, M. , & Arain, M. A. . (1999). Effect of drought simulation on grain weight, protein and lysine content of bread wheat (triticum aestivum l.). Pakistan Journal of Botany, 31(1), 109-114.	Asia	Pakistan	sindh	25°N,69°E							field	70	TD					12.95	13.08	2.27193	2.29474
Ahmad, M. , & Arain, M. A. . (1999). Effect of drought simulation on grain weight, protein and lysine content of bread wheat (triticum aestivum l.). Pakistan Journal of Botany, 31(1), 109-114.	Asia	Pakistan	sindh	25°N,69°E							field	70	TD					13.48	13.72	2.36491	2.40702
Ahmad, M. , & Arain, M. A. . (1999). Effect of drought simulation on grain weight, protein and lysine content of bread wheat (triticum aestivum l.). Pakistan Journal of Botany, 31(1), 109-114.	Asia	Pakistan	sindh	25°N,69°E							field	70	TD					13.22	13.72	2.3193	2.40702
Ahmad, M. , & Arain, M. A. . (1999). Effect of drought simulation on grain weight, protein and lysine content of bread wheat (triticum aestivum l.). Pakistan Journal of Botany, 31(1), 109-114.	Asia	Pakistan	sindh	25°N,69°E							field	70	TD					13.48	13.72	2.36491	2.40702
Ahmad, M. , & Arain, M. A. . (1999). Effect of drought simulation on grain weight, protein and lysine content of bread wheat (triticum aestivum l.). Pakistan Journal of Botany, 31(1), 109-114.	Asia	Pakistan	sindh	25°N,69°E							field	70	TD					12.95	15.45	2.27193	2.71053
Ahmad, M. , & Arain, M. A. . (1999). Effect of drought simulation on grain weight, protein and lysine content of bread wheat (triticum aestivum l.). Pakistan Journal of Botany, 31(1), 109-114.	Asia	Pakistan	sindh	25°N,69°E							field	70	TD					13.48	14.44	2.36491	2.53333
Ahmad, M. , & Arain, M. A. . (1999). Effect of drought simulation on grain weight, protein and lysine content of bread wheat (triticum aestivum l.). Pakistan Journal of Botany, 31(1), 109-114.	Asia	Pakistan	sindh	25°N,69°E							field	70	TD					13.22	13.84	2.3193	2.42807
Ahmad, M. , & Arain, M. A. . (1999). Effect of drought simulation on grain weight, protein and lysine content of bread wheat (triticum aestivum l.). Pakistan Journal of Botany, 31(1), 109-114.	Asia	Pakistan	sindh	25°N,69°E							field	70	TD					13.48	13.96	2.36491	2.44912
Ahmad, M. , & Arain, M. A. . (1999). Effect of drought simulation on grain weight, protein and lysine content of bread wheat (triticum aestivum l.). Pakistan Journal of Botany, 31(1), 109-114.	Asia	Pakistan	sindh	25°N,69°E							field	70	CD					12.95	15.34	2.27193	2.69123
Ahmad, M. , & Arain, M. A. . (1999). Effect of drought simulation on grain weight, protein and lysine content of bread wheat (triticum aestivum l.). Pakistan Journal of Botany, 31(1), 109-114.	Asia	Pakistan	sindh	25°N,69°E							field	70	CD					13.48	13.72	2.36491	2.40702
Ahmad, M. , & Arain, M. A. . (1999). Effect of drought simulation on grain weight, protein and lysine content of bread wheat (triticum aestivum l.). Pakistan Journal of Botany, 31(1), 109-114.	Asia	Pakistan	sindh	25°N,69°E							field	70	CD					13.22	14.08	2.3193	2.47018
Ahmad, M. , & Arain, M. A. . (1999). Effect of drought simulation on grain weight, protein and lysine content of bread wheat (triticum aestivum l.). Pakistan Journal of Botany, 31(1), 109-114.	Asia	Pakistan	sindh	25°N,69°E							field	70	CD					13.48	14.44	2.36491	2.53333
Wang, L.,Cao, J., Jin, Z,. (1997). Water and fertilizer effects on spring wheat yield and quality. Journal of Zhangjiakou Agricultural College (01)	Asia	China	Zhangjiakou	41°N,115°E	spring	1994	2.6	247	40.9	sandy	field	90	TD	4282.49	4208	602.975	635.829	14.08	15.11	2.49298	2.65088
Wang, L.,Cao, J., Jin, Z,. (1997). Water and fertilizer effects on spring wheat yield and quality. Journal of Zhangjiakou Agricultural College (01)	Asia	China	Zhangjiakou	41°N,115°E	spring	1994	2.6	247	40.9	sandy	field	90	TD	4282.49	4661.18	602.975	670.744	14.08	14.39	2.49298	2.52456
Wang, L.,Cao, J., Jin, Z,. (1997). Water and fertilizer effects on spring wheat yield and quality. Journal of Zhangjiakou Agricultural College (01)	Asia	China	Zhangjiakou	41°N,115°E	spring	1994	2.6	247	40.9	sandy	field	90	CD	4282.49	3056.5	602.975	539.167	14.08	17.64	2.49298	3.09474
Wang, L.,Cao, J., Jin, Z,. (1997). Water and fertilizer effects on spring wheat yield and quality. Journal of Zhangjiakou Agricultural College (01)	Asia	China	Zhangjiakou	41°N,115°E	spring	1994	2.6	247	40.9	sandy	field	180	TD	4697.74	4964.29	686.81	753.579	14.62	15.18	2.58421	2.66316
Wang, L.,Cao, J., Jin, Z,. (1997). Water and fertilizer effects on spring wheat yield and quality. Journal of Zhangjiakou Agricultural College (01)	Asia	China	Zhangjiakou	41°N,115°E	spring	1994	2.6	247	40.9	sandy	field	180	TD	4697.74	5310.94	686.81	778.052	14.62	14.65	2.58421	2.57018
Wang, L.,Cao, J., Jin, Z,. (1997). Water and fertilizer effects on spring wheat yield and quality. Journal of Zhangjiakou Agricultural College (01)	Asia	China	Zhangjiakou	41°N,115°E	spring	1994	2.6	247	40.9	sandy	field	180	CD	4697.74	3847.46	686.81	674.844	14.62	17.54	2.58421	3.07719
Wang, L.,Cao, J., Jin, Z,. (1997). Water and fertilizer effects on spring wheat yield and quality. Journal of Zhangjiakou Agricultural College (01)	Asia	China	Zhangjiakou	41°N,115°E	spring	1994	2.6	247	40.9	sandy	field	270	TD	5548.02	5877.07	808.901	936.804	14.58	15.94	2.57544	2.79649
Wang, L., Cao, J., Jin, Z,. (1997). Water and fertilizer effects on spring wheat yield and quality. Journal of Zhangjiakou Agricultural College (01)	Asia	China	Zhangjiakou	41°N,115°E	spring	1994	2.6	247	40.9	sandy	field	270	TD	5548.02	6008.69	808.901	875.466	14.58	14.57	2.57544	2.55614
Wang, L.,Cao, J., Jin, Z,. (1997). Water and fertilizer effects on spring wheat yield and quality. Journal of Zhangjiakou Agricultural College (01)	Asia	China	Zhangjiakou	41°N,115°E	spring	1994	2.6	247	40.9	sandy	field	270	CD	5548.02	4954.8	808.901	845.784	14.58	17.07	2.57544	2.99474
Dai,Z., Zhang, X., Zhang, H., Li, Y., & Wang, Z., (2015). The effects of different irrigation modes on the content of wheat grain protein and its components. Journal of Nuclear Agriculture (09), 1791-1798.	Asia	China	Dezhou	37°N,116°E		2011-2012	25	149.9			field	224	CD	7836	7155	955.8	901.1	12.2	12.62	2.14035	2.21404
Dai,Z., Zhang, X., Zhang, H., Li, Y., & Wang, Z., (2015). The effects of different irrigation modes on the content of wheat grain protein and its components. Journal of Nuclear Agriculture (09), 1791-1798.	Asia	China	Dezhou	37°N,116°E		2011-2012	25	149.9			field	224	CD	8028	7352	888.4	850.5	11.09	11.62	1.94561	2.0386
Dai,Z., Zhang, X., Zhang, H., Li, Y., & Wang, Z., (2015). The effects of different irrigation modes on the content of wheat grain protein and its components. Journal of Nuclear Agriculture (09), 1791-1798.	Asia	China	Dezhou	37°N,116°E		2012-2013	25	149.9			field	224	CD	7165	6648	842.1	800	11.82	12.14	2.07368	2.12982
Dai,Z., Zhang, X., Zhang, H., Li, Y., & Wang, Z., (2015). The effects of different irrigation modes on the content of wheat grain protein and its components. Journal of Nuclear Agriculture (09), 1791-1798.	Asia	China	Dezhou	37°N,116°E		2012-2013	25	149.9			field	224	CD	7562	6925	867.4	812.6	11.49	11.82	2.01579	2.07368
Sun, M., Ge, X., Gao, Z., Ren, A., Deng, Y., Zhao, W., & Zhao, H., (2014). Relationship Between Water Storage Conservation in Fallow Period and Grains Protein Formation in Dryland Wheat in Different Precipitation Years. Chinese Agricultural Sciences (09), 1692-1704.	Asia	China	Shanxi Agricultural University	35°09’N,110°59’E		2009-2010	12.5	334.86	8.65		field	150	CD	5412.04	3950.04	721.21	585.4	13.33	14.82	2.3386	2.6
Sun, M., Ge, X., Gao, Z., Ren, A., Deng, Y., Zhao, W., & Zhao, H., (2014). Relationship Between Water Storage Conservation in Fallow Period and Grains Protein Formation in Dryland Wheat in Different Precipitation Years. Chinese Agricultural Sciences (09), 1692-1704.	Asia	China	Shanxi Agricultural University	35°09’N,110°59’E		2010-2011	12.5	334.86	8.57		field	150	CD	5612.45	3601.2	756.91	543.06	13.49	15.08	2.36667	2.64561
Sun, M., Ge, X., Gao, Z., Ren, A., Deng, Y., Zhao, W., & Zhao, H., (2014). Relationship Between Water Storage Conservation in Fallow Period and Grains Protein Formation in Dryland Wheat in Different Precipitation Years. Chinese Agricultural Sciences (09), 1692-1704.	Asia	China	Shanxi Agricultural University	35°09’N,110°59’E		2011-2012	12.5	334.86	8.72		field	150	CD	4155.6	2620.13	536.96	405.07	12.92	15.46	2.26667	2.71228
Wang, X., & Yu, Z.,(2008). Effect of Irrigation Rate on Absorption and Translocation of Nitrogen Under Different Nitrogen Fertilizer Rate in Wheat. Chinese Agricultural Sciences (10), 3015-3024	Asia	China	Shandong Agricultural University	36°N,117°E		2003-2004			10		field	120	TD	8705.94	5534.26	1179.65	925.88	13.55	16.73	2.37719	2.93509
Wang, X., & Yu, Z.,(2008). Effect of Irrigation Rate on Absorption and Translocation of Nitrogen Under Different Nitrogen Fertilizer Rate in Wheat. Chinese Agricultural Sciences (10), 3015-3024	Asia	China	Shandong Agricultural University	36°N,117°E		2004-2005			10		field	240	TD	8414.66	5129.71	1070.34	792.03	12.72	15.44	2.23158	2.70877
Fan, X., Jiang, D., Dai, T., Jing, Q., & Cao, W. ,(2006). Effects of nitrogen supply on nitrogen metabolism and grain protein accumulation of wheat under different water treatments. Journal of Ecology (02), 149-154.	Asia	China	Nanjing Agricultural University	32.02°N,1118.86°E		2001-2002			8.7		field	120	TD	5400	3924	745	610	14.3	15.6	2.50877	2.73684
Fan, X., Jiang, D., Dai, T., Jing, Q., & Cao, W. ,(2006). Effects of nitrogen supply on nitrogen metabolism and grain protein accumulation of wheat under different water treatments. Journal of Ecology (02), 149-154.	Asia	China	Nanjing Agricultural University	32.02°N,1118.86°E		2002-2003			8.7		field	120	TD	5416	4209	617	560	11.3	13.2	1.98246	2.31579
Fan, X., Jiang, D., Dai, T., Jing, Q., & Cao, W. ,(2006). Effects of nitrogen supply on nitrogen metabolism and grain protein accumulation of wheat under different water treatments. Journal of Ecology (02), 149-154.	Asia	China	Nanjing Agricultural University	32.02°N,1118.86°E		2001-2002			8.7		field	240	TD	5573	4097	843	640	15.1	15.9	2.64912	2.78947
Fan, X., Jiang, D., Dai, T., Jing, Q., & Cao, W. ,(2006). Effects of nitrogen supply on nitrogen metabolism and grain protein accumulation of wheat under different water treatments. Journal of Ecology (02), 149-154.	Asia	China	Nanjing Agricultural University	32.02°N,1118.86°E		2002-2003			8.7		field	240	TD	5794	4557	723	624	12.9	13.6	2.26316	2.38596
Liu, Q., Niu, X., Zhao, J., Wu, Z., Yang, S., Zhao, G., & Chang , X., (2007). Effect of irrgiation treamtents on the yield and quality of different wheat varieties. China Agricultural Science and Technology Review (02), 53-56.	Asia	China	Xinxiang	35°19′N，113°53′E		2005-2006		144.1		loam	field	225	TD	5701	4483	852.299	677.83	14.95	15.12	2.62281	2.65263
Li, X., Yao, Z., Guan, T., Guo, T., & Feng, W.,(2010). Effects of Irrigation on Nitrogen Metabolism and Yield of Strong Gluten Wheat. Agricultural Science & Technology(03),68-71. doi:10.16175/j.cnki.1009-4229.2010.03.020.	Asia	China	Henan Agricultural University	34.79°N,113.67°E	winter	2003-2004					field	240	TD	7501.61	7183.58	996.96	974.09	13.29	13.56	2.33158	2.37895
Li, X., Yao, Z., Guan, T., Guo, T., & Feng, W.,(2010). Effects of Irrigation on Nitrogen Metabolism and Yield of Strong Gluten Wheat. Agricultural Science & Technology(03),68-71. doi:10.16175/j.cnki.1009-4229.2010.03.020.	Asia	China	Henan Agricultural University	34.79°N,113.67°E	winter	2004-2005					field	240	CD	7501.61	5025.12	996.96	701.12	13.29	13.95	2.33158	2.44737
Fan, X., Jiang, D.,Dai, T., Jing, Q., Cao, W.,(2004). Effects of post_anthesis drought and waterlogging on the quality of grain formation in different wheat varieties. Acta Phytoecologica Sinica(05),680-685.	Asia	China	Nanjing Agricultural University	34.79°N,113.67°E		2001-2002			8.7		field	180	TD	5360	3840	739	619	13.81	16.07	2.42281	2.8193
Fan, X., Jiang, D.,Dai, T., Jing, Q., Cao, W.,(2004). Effects of post_anthesis drought and waterlogging on the quality of grain formation in different wheat varieties. Acta Phytoecologica Sinica(05),680-685.	Asia	China	Nanjing Agricultural University	34.79°N,113.67°E		2002-2003			8.7		field	180	TD	5290	4200	600	539	11.32	12.8	1.98596	2.24561
Fan, X., Jiang, D.,Dai, T., Jing, Q., Cao, W.,(2006).Effects of nitrogen on grain yield and quality in wheat grown under drought or waterlogging stress from anthesis to maturity. Acta Phytoecologica Sinica(01),71-77.	Asia	China	Nanjing Agricultural University	34.79°N,113.67°E		2001-2002			8.7		field	120	TD	5400	3924	772.2	612.144	14.3	15.6	2.50877	2.73684
Fan, X., Jiang, D.,Dai, T., Jing, Q., Cao, W.,(2006).Effects of nitrogen on grain yield and quality in wheat grown under drought or waterlogging stress from anthesis to maturity. Acta Phytoecologica Sinica (01),71-77.	Asia	China	Nanjing Agricultural University	34.79°N,113.67°E		2002-2003			8.7		field	120	TD	5416	4209	612.008	555.588	11.3	13.2	1.98246	2.31579
Fan, X., Jiang, D.,Dai, T., Jing, Q., Cao, W.,(2006).Effects of nitrogen on grain yield and quality in wheat grown under drought or waterlogging stress from anthesis to maturity. Acta Phytoecologica Sinica (01),71-77.	Asia	China	Nanjing Agricultural University	34.79°N,113.67°E		2001-2002			8.7		field	240	TD	5573	4097	841.523	651.423	15.1	15.9	2.64912	2.78947
Fan, X., Jiang, D.,Dai, T., Jing, Q., Cao, W.,(2006).Effects of nitrogen on grain yield and quality in wheat grown under drought or waterlogging stress from anthesis to maturity. Acta Phytoecologica Sinica (01),71-77.	Asia	China	Nanjing Agricultural University	34.79°N,113.67°E		2002-2003			8.7		field	240	TD	5794	4557	747.426	619.752	12.9	13.6	2.26316	2.38596
Wu,J., Jin, Y., Xie, Y.,(1983).The effect of dry drought in later period on wheat physiology, yield and quality. Journal of Henan Agricultural College (02),40-44.	Asia	China	Henan Agricultural University	34.79°N,113.67°E		1981			9.1	loam	field	179.4	TD	7416.75	4066.5	1208.93	707.571	16.3	17.4	2.85965	3.05263
Wu,J., Jin, Y., Xie, Y.,(1983).The effect of dry drought in later period on wheat physiology, yield and quality. Journal of Henan Agricultural College (02),40-44.	Asia	China	Henan Agricultural University	34.79°N,113.67°E		1982			9.1	loam	field	179.4	TD	5883.75	3717	994.354	657.909	16.9	17.7	2.96491	3.10526
Zhang, M., Liu, T., Li, Y., Li, C., Guo, Z., Jia, X., Cai, R., (2019). Effect of irrigation times on nitrogen accumulation, transportation and grain protein content of strong gluten wheat. Journal of Triticeae Crops (07),802-809.	Asia	China	Baoding	115.36°E,39.03°N	winter	2017-2018		209.9	22.4		field	110.4	TD	6575.67	5501.78	934.31	861.31	14.18	15.61	2.48772	2.7386
Zhang, M., Liu, T., Li, Y., Li, C., Guo, Z., Jia, X., Cai, R., (2019). Effect of irrigation times on nitrogen accumulation, transportation and grain protein content of strong gluten wheat. Journal of Triticeae Crops (07),802-809.	Asia	China	Baoding	115.36°E,39.03°N	winter	2017-2018		209.9	22.4		field	110.4	TD	8525.67	6388	1186.13	963.5	14.57	15.06	2.55614	2.64211
Zhang, M., Liu, T., Li, Y., Li, C., Guo, Z., Jia, X., Cai, R., (2019). Effect of irrigation times on nitrogen accumulation, transportation and grain protein content of strong gluten wheat. Journal of Triticeae Crops (07),802-809.	Asia	China	Baoding	115.36°E,39.03°N	winter	2017-2018		209.9	22.4		field	110.4	TD	6701	5343.67	1083.94	897.81	16.1	16.73	2.82456	2.93509
Zhang, M., Liu, T., Li, Y., Li, C., Guo, Z., Jia, X., Cai, R., (2019). Effect of irrigation times on nitrogen accumulation, transportation and grain protein content of strong gluten wheat. Journal of Triticeae Crops (07),802-809.	Asia	China	Baoding	115.36°E,39.03°N	winter	2017-2018		209.9	22.4		field	110.4	TD	6648.89	4930.67	923.36	722.63	14.1	15.33	2.47368	2.68947
Wang,X., Yu, Z.,(2009).Effect of Interactions between Water Management and Nitrogen Fertilizer on Wheat Processing Quality and Protein Fractions. Journal of Triticeae Crops(03),518-523.	Asia	China	Shandong Agricultural University	36°N,117°E		2004-2005		120	10		field	120	CD	8705.94	4725.16	1107.4	689.87	12.72	14.6	2.23158	2.5614
Wang,X., Yu, Z.,(2009).Effect of Interactions between Water Management and Nitrogen Fertilizer on Wheat Processing Quality and Protein Fractions. Journal of Triticeae Crops(03),518-523.	Asia	China	Shandong Agricultural University	36°N,117°E		2004-2005		120	10		field	240	CD	8414.66	4854.61	1140.19	771.88	13.55	15.9	2.37719	2.78947
Kang, L., Wei, Y., Zhang, J.,(1998).Experimental Research on the Influence of Water and Fertilizer Conditions on the Physiological Characteristics and Yield of Winter Wheat. Agricultural Research in the Arid Areas (04),3-5.	Asia	China	Henan Agricultural University	34.79°N,113.67°E	winter	1990-1991			12.8	sandy	field	60	CD	4034.95	2070.9	462.4	290.4	11.46	14.02	2.01053	2.45965
Kang, L., Wei, Y., Zhang, J.,(1998).Experimental Research on the Influence of Water and Fertilizer Conditions on the Physiological Characteristics and Yield of Winter Wheat. Agricultural Research in the Arid Areas (04),3-5.	Asia	China	Henan Agricultural University	34.79°N,113.67°E	winter	1991-1992			12.8	sandy	field	120	CD	4959.75	2268.75	610.65	331.05	12.31	14.59	2.15965	2.55965
Kang, L., Wei, Y., Zhang, J.,(1998).Experimental Research on the Influence of Water and Fertilizer Conditions on the Physiological Characteristics and Yield of Winter Wheat. Agricultural Research in the Arid Areas (04),3-5.	Asia	China	Henan Agricultural University	34.79°N,113.67°E	winter	1993-1994			12.8	sandy	field	180	CD	5046.75	2518.95	670.2	393.45	13.28	15.62	2.32982	2.74035
Peng, Y., Guo, T., Jiang, G., Wang,C., Li, Y., Zhang, X.,(2004).Effects of different water irrigation schemes after anthesis in quality of two gluten winter wheat varieties. Acta Phytoecologica Sinica(04),554-561.	Asia	China	Luoyang	34.62°N,112.46°E	winter	2000-2001			14.2	loam	field	5.4	TD	732.8	647.5
Peng, Y., Guo, T., Jiang, G., Wang,C., Li, Y., Zhang, X.,(2004).Effects of different water irrigation schemes after anthesis in quality of two gluten winter wheat varieties. Acta Phytoecologica Sinica(04),554-561.	Asia	China	Luoyang	34.62°N,112.46°E	winter	2000-2001			14.2	loam	field	5.4	TD	613	584.3
Shi, H., Li, C.,(1989).The effect of irrigation on yield and nutritional quality of wheat in the middle and late stages. Journal of Henan Vocational and Technical Teachers College.(Z1),108-112+52.	Asia	China	Xinxiang	35°19′N，113°53′E		1985		127.2		loam	field	76.46	TD	6575.71	2433.28	800.45	350.97	15.13	16.39	2.65439	2.87544
Shi, H., Li, C.,(1989).The effect of irrigation on yield and nutritional quality of wheat in the middle and late stages. Journal of Henan Vocational and Technical Teachers College.(Z1),108-112+52.	Asia	China	Xinxiang	35°19′N，113°53′E		1989		149.6		loam	field	76.46	TD	6365.82	5472.26	882.31	802.7	15.75	16.67	2.76316	2.92456
Zhang, S., Yang, X., Li, X., Yang, M., Wang, H., He, D.,(2019).Influence of soil moisture on decomposition of maize stalk, soil fertility and grain protein yield on winter wheat.Journal of Triticeae Crops(02),186-193.	Asia	China	Shangqiu	34°34′N,115°33′E	winter	2014-1015	13.9		10.5		field	240	CD	8123	6998	91.47	90.14	11.26	12.88	1.97544	2.25965
Sun, M., Guo, P., Gao, Z., Wang, P., Shi, J., Miao, G.,(2010).Protein Accumulation in Grains of Wheat Cultivars Differing in Drought Tol_x0002_erance and Its Regulation by Nitrogen Application Amount under Irrigated and Dryland Conditions. ACTA AGRONOMICA SINICA(03),486-495.	Asia	China	Shanxi Agricultural University	35°09’N,110°59’E		2007-2008		124.05	12.6		field	70	TD	6697.13	5735.85	932.91	807.608	13.93	14.08	2.44386	2.47018
Sun, M., Guo, P., Gao, Z., Wang, P., Shi, J., Miao, G.,(2010).Protein Accumulation in Grains of Wheat Cultivars Differing in Drought Tol_x0002_erance and Its Regulation by Nitrogen Application Amount under Irrigated and Dryland Conditions. ACTA AGRONOMICA SINICA(03),486-495.	Asia	China	Shanxi Agricultural University	35°09’N,110°59’E		2008-2009		101.65	12.6		field	70	TD	6135.15	5516.55	861.375	785.005	14.04	14.23	2.46316	2.49649
Sun, M., Guo, P., Gao, Z., Wang, P., Shi, J., Miao, G.,(2010).Protein Accumulation in Grains of Wheat Cultivars Differing in Drought Tol_x0002_erance and Its Regulation by Nitrogen Application Amount under Irrigated and Dryland Conditions. ACTA AGRONOMICA SINICA(03),486-495.	Asia	China	Shanxi Agricultural University	35°09’N,110°59’E		2007-2008		124.05	12.6		field	140	TD	7196.18	6052.58	1021.14	901.229	14.19	14.89	2.48947	2.61228
Sun, M., Guo, P., Gao, Z., Wang, P., Shi, J., Miao, G.,(2010).Protein Accumulation in Grains of Wheat Cultivars Differing in Drought Tol_x0002_erance and Its Regulation by Nitrogen Application Amount under Irrigated and Dryland Conditions. ACTA AGRONOMICA SINICA(03),486-495.	Asia	China	Shanxi Agricultural University	35°09’N,110°59’E		2008-2009		101.65	12.6		field	140	TD	6515.46	5931.83	936.923	902.231	14.38	15.21	2.52281	2.66842
Sun, M., Guo, P., Gao, Z., Wang, P., Shi, J., Miao, G.,(2010).Protein Accumulation in Grains of Wheat Cultivars Differing in Drought Tol_x0002_erance and Its Regulation by Nitrogen Application Amount under Irrigated and Dryland Conditions. ACTA AGRONOMICA SINICA(03),486-495.	Asia	China	Shanxi Agricultural University	35°09’N,110°59’E		2007-2008		124.05	12.6		field	280	TD	7509	6515.48	1127.1	1019.02	15.01	15.64	2.63333	2.74386
Sun, M., Guo, P., Gao, Z., Wang, P., Shi, J., Miao, G.,(2010).Protein Accumulation in Grains of Wheat Cultivars Differing in Drought Tol_x0002_erance and Its Regulation by Nitrogen Application Amount under Irrigated and Dryland Conditions. ACTA AGRONOMICA SINICA(03),486-495.	Asia	China	Shanxi Agricultural University	35°09’N,110°59’E		2008-2009		101.65	12.6		field	280	TD	6873.3	6320.18	1054.36	1023.87	15.34	16.2	2.69123	2.84211
Sun, M., Gao, Z., Yuan, C., Miao, G.,(2010).Study on Protein Accumulation in Grains of Wheat Varieties Differing in Drought Tolerance under Irri- gated and Dryland Conditions. J.SHANXI AGRIC.UNIV ( Natura l S cience Ed ition )(03),217-222.	Asia	China	Shanxi Agricultural University	35°09’N,110°59’E		2008-2009		367.2	12.6		field	140	TD	5689.35	4688.6	791.389	697.195	13.91	14.87	2.44035	2.60877
Sun, M., Gao, Z., Yuan, C., Miao, G.,(2010).Study on Protein Accumulation in Grains of Wheat Varieties Differing in Drought Tolerance under Irri- gated and Dryland Conditions. J.SHANXI AGRIC.UNIV ( Natura l S cience Ed ition )(03),217-222.	Asia	China	Shanxi Agricultural University	35°09’N,110°59’E		2008-2009		367.2	12.6		field	140	TD	7075.96	3919.34	1035.92	651.786	14.64	16.63	2.56842	2.91754
Xiang, Y., Wu,J., Li, Y., Huang, M., Duan, W.,(2017).Effects of Water Managements After Jointing on Nitrogen Uptake and Utilization and Protein Yield in Winter Wheat Cultivar AK58.Journal of Nuclear Agricultural Sciences(04),787-793.	Asia	China	Luoyang	34.62°N,112.46°E	winter	2013-2014			12.25	loam	field	180	TD	7111	5781	863.04	757.89	12.14	13.11	2.12982	2.3
Xiang, Y., Wu,J., Li, Y., Huang, M., Duan, W.,(2017).Effects of Water Managements After Jointing on Nitrogen Uptake and Utilization and Protein Yield in Winter Wheat Cultivar AK58.Journal of Nuclear Agricultural Sciences(04),787-793.	Asia	China	Luoyang	34.62°N,112.46°E	winter	2014-2015			12.25	loam	field	180	TD	7812	6137	954.98	845.45	12.22	13.78	2.14386	2.41754
CAMPBELL, C., A., DAVIDSON, H., & R., et al. (1977). Effects of fertilizer n and soil moisture on yield, yield components, protein content and n accumulation in the aboveground parts of spring wheat. Canadian Journal of Soil Science.	North America	Canada	Saskatchewan	52.13°N,106.69°W	spring					loam	field	20.5	CD	3797.64	1578.24	548	246.6	14.48	15.73	2.54035	2.75965
CAMPBELL, C., A., DAVIDSON, H., & R., et al. (1977). Effects of fertilizer n and soil moisture on yield, yield components, protein content and n accumulation in the aboveground parts of spring wheat. Canadian Journal of Soil Science.	North America	Canada	Saskatchewan	52.13°N,106.69°W	spring					loam	field	41	CD	4153.84	1753.6	624.72	290.44	15.05	16.64	2.64035	2.9193
CAMPBELL, C., A., DAVIDSON, H., & R., et al. (1977). Effects of fertilizer n and soil moisture on yield, yield components, protein content and n accumulation in the aboveground parts of spring wheat. Canadian Journal of Soil Science.	North America	Canada	Saskatchewan	52.13°N,106.69°W	spring					loam	field	61.5	CD	4394.96	1731.68	652.12	295.92	14.82	16.99	2.6	2.9807
CAMPBELL, C., A., DAVIDSON, H., & R., et al. (1977). Effects of fertilizer n and soil moisture on yield, yield components, protein content and n accumulation in the aboveground parts of spring wheat. Canadian Journal of Soil Science.	North America	Canada	Saskatchewan	52.13°N,106.69°W	spring					loam	field	82	CD	4394.96	2027.6	663.08	350.72	15.1	17.39	2.64912	3.05088
CAMPBELL, C., A., DAVIDSON, H., & R., et al. (1977). Effects of fertilizer n and soil moisture on yield, yield components, protein content and n accumulation in the aboveground parts of spring wheat. Canadian Journal of Soil Science.	North America	Canada	Saskatchewan	52.13°N,106.69°W	spring					loam	field	123	CD	5425.2	2192	822	367.16	15.16	16.82	2.65965	2.95088
CAMPBELL, C., A., DAVIDSON, H., & R., et al. (1977). Effects of fertilizer n and soil moisture on yield, yield components, protein content and n accumulation in the aboveground parts of spring wheat. Canadian Journal of Soil Science.	North America	Canada	Saskatchewan	52.13°N,106.69°W	spring					loam	field	164	CD	4882.68	2367.36	767.2	400.04	15.68	16.99	2.75088	2.9807
Seligman, N. G. , & Sinclair, T. R. . (1995). Global environment change and simulated forage quality of wheat ii. water and nitrogen stress. Field Crops Research, 40(1), 29-37.	Asia	Israel	Gilat	31°21′N,34°42′E		1985	14.8	184			field	50	CD	2448.98	2246.58
Seligman, N. G. , & Sinclair, T. R. . (1995). Global environment change and simulated forage quality of wheat ii. water and nitrogen stress. Field Crops Research, 40(1), 29-37.	Asia	Israel	Gilat	31°21′N,34°42′E		1985	14.8	184			field	100	CD	3319.73	2520.55
Seligman, N. G. , & Sinclair, T. R. . (1995). Global environment change and simulated forage quality of wheat ii. water and nitrogen stress. Field Crops Research, 40(1), 29-37.	Asia	Israel	Gilat	31°21′N,34°42′E		1985	14.8	184			field	150	CD	4136.05	2849.32
Seligman, N. G. , & Sinclair, T. R. . (1995). Global environment change and simulated forage quality of wheat ii. water and nitrogen stress. Field Crops Research, 40(1), 29-37.	Asia	Israel	Gilat	31°21′N,34°42′E		1985	14.8	184			field	200	CD	5115.65	3287.67
Liu, Y. , Liang, H. , Lv, X. , Liu, D. , Wen, X. , & Liao, Y. . (2016). Effect of polyamines on the grain filling of wheat under drought stress. Plant Physiology & Biochemistry Ppb, 100, 113-129.	Asia	China	Northwest A&F University	34°22′N,108°26′E	winter	2012-2013	12.9	550	12.34	loam	field	101.7	TD	5500	4300
Liu, Y. , Liang, H. , Lv, X. , Liu, D. , Wen, X. , & Liao, Y. . (2016). Effect of polyamines on the grain filling of wheat under drought stress. Plant Physiology & Biochemistry Ppb, 100, 113-129.	Asia	China	Northwest A&F University	34°22′N,108°26′E	winter	2012-2013	12.9	550	12.34	loam	field	101.7	TD	7900	6900
Liu, Y. , Liang, H. , Lv, X. , Liu, D. , Wen, X. , & Liao, Y. . (2016). Effect of polyamines on the grain filling of wheat under drought stress. Plant Physiology & Biochemistry Ppb, 100, 113-129.	Asia	China	Northwest A&F University	34°22′N,108°26′E	winter	2013-2014	12.9	550	12.34	loam	field	101.7	TD	5800	4600
Liu, Y. , Liang, H. , Lv, X. , Liu, D. , Wen, X. , & Liao, Y. . (2016). Effect of polyamines on the grain filling of wheat under drought stress. Plant Physiology & Biochemistry Ppb, 100, 113-129.	Asia	China	Northwest A&F University	34°22′N,108°26′E	winter	2013-2014	12.9	550	12.34	loam	field	101.7	TD	8700	7700
Ebeed, H. T. , Hassan, N. M. , & Aljarani, A. M. . (2017). Exogenous applications of polyamines modulate drought responses in wheat through osmolytes accumulation, increasing free polyamine levels and regulation of polyamine biosynthetic genes. Plant Physiology & Biochemistry, 118, 438.	Africa	Egypt	Giza	30°01′N,31°12′E			22				field	250	TD	479.6	313.8
Ebeed, H. T. , Hassan, N. M. , & Aljarani, A. M. . (2017). Exogenous applications of polyamines modulate drought responses in wheat through osmolytes accumulation, increasing free polyamine levels and regulation of polyamine biosynthetic genes. Plant Physiology & Biochemistry, 118, 438.	Africa	Egypt	Giza	30°01′N,31°12′E			22				field	250	TD	440.2	328.8
A, S. A. R. H. , & B, O. A. M. A. . (2014). Physiological and biochemical studies on drought tolerance of wheat plants by application of amino acids and yeast extract. Annals of Agricultural ences, 59( 1), 133-145.	Africa	Egypt	Shebin El-Kom	30.46°N,30.67°E	spring	2010-2011			184	clay	field	178.55	CD	6975.13	4142.23
A, S. A. R. H. , & B, O. A. M. A. . (2014). Physiological and biochemical studies on drought tolerance of wheat plants by application of amino acids and yeast extract. Annals of Agricultural ences, 59( 1), 133-145.	Africa	Egypt	Shebin El-Kom	30.46°N,30.67°E	spring	2011-2012			184	clay	field	178.55	CD	7403.64	4285.06
Shen, X., Sun, J., Liu, Z., Zhang, J., Liu, X.,(2010).Effects of low irrigation limits on yield and grain quality of winter wheat. Transactions of the CSAE(12),58-65.	Asia	China	Xinxiang	35°19′N，113°53′E	winter	2005-2006	13.5	610	9.7	loam	field	175.13	TD	8325	7375	1145.52	1070.85	13.76	14.52	2.41404	2.54737
Shen, X., Sun, J., Liu, Z., Zhang, J., Liu, X.,(2010).Effects of low irrigation limits on yield and grain quality of winter wheat. Transactions of the CSAE(12),58-65.	Asia	China	Xinxiang	35°19′N，113°53′E	winter	2006-2007	13.5	610	9.7	loam	field	175.13	TD	8097.32	6656.11	1123.1	966.467	13.87	14.52	2.43333	2.54737
Shen, X., Sun, J., Liu, Z., Zhang, J., Liu, X.,(2010).Effects of low irrigation limits on yield and grain quality of winter wheat. Transactions of the CSAE(12),58-65.	Asia	China	Xinxiang	35°19′N，113°53′E	winter	2007-2008	13.5	610	9.7	loam	field	175.13	TD	8223.35	7277.13
Zhu, P., Wang, D., Zhang, Y., Wang, X., Wang, X., Yu, Z.,(2009).Effects of Irrigation Stage and Amount on Water Consumption Characteristics, Grain Yield and Content of Protein Components of Wheat. Scientia Agricultura Sinica(04),1306-1315.	Asia	China	Shandong Agricultural University	36°N,117°E		2004-2005		196.1	10.4	loam	field	210	CD	8901.4	7745.57	1245.31	1068.89	13.99	13.8	2.45439	2.42105
Zhu, P., Wang, D., Zhang, Y., Wang, X., Wang, X., Yu, Z.,(2009).Effects of Irrigation Stage and Amount on Water Consumption Characteristics, Grain Yield and Content of Protein Components of Wheat. Scientia Agricultura Sinica(04),1306-1315.	Asia	China	Shandong Agricultural University	36°N,117°E		2005-2006		196.1	14.2	loam	field	210	CD	8901.4	7745.57	1245.31	1068.89	13.99	13.8	2.45439	2.42105
Wang,X., Zhang, Y., Yu, Z.,(2010).Effect of Water-nitrogen Interaction on Grain Protein Quality, Nitrogen Use Efficiency and Water Use Efficiency of Jimai 20. Journal of Triticeae Crops(02),318-325.	Asia	China	Shandong Agricultural University	36°N,117°E		2004-2005		196.1	10		field	180	CD	9558.26	8790.07	1445.79	1274.19	15.1261	14.4958	2.65369	2.54312
Wang,X., Zhang, Y., Yu, Z.,(2010).Effect of Water-nitrogen Interaction on Grain Protein Quality, Nitrogen Use Efficiency and Water Use Efficiency of Jimai 20. Journal of Triticeae Crops(02),318-325.	Asia	China	Shandong Agricultural University	36°N,117°E		2004-2005		196.1	10		field	240	CD	9461.57	8714.51	1441.1	1290.7	15.2311	14.8109	2.67212	2.59841
GY = grain yield
GPY = grain protein yield
GPC = grain protein concentration
GNC = grain nitrogen concentration
N = nitrogen
N_app = nitrogen application rate
