# Supplementary material for: How Does the Environment Affect Wheat Yield and Protein Content Response to Drought? A Meta-Analysis
Source: Front Plant Sci. 2022 Jun 30;13:896985. doi: 10.3389/fpls.2022.896985 (PMC9280411; doi:10.3389/fpls.2022.896985)
Supplement: Supplementary file 2 [file Table_2.xlsx]

## Sheet: Sheet1
		N application	Organic matter	Precipitation	Temperature	Drought type	% Var explained
MSE increase (%)	GY	11.966	14.4645	14.7939	15.4677	17.1032	65.82
	GPY	12.282	12.6316	14.2457	13.8427	11.6957	67.23
	GPC	10.01	8.22	14.28	3.52	—	1.24
	GNC	7.24	9.76	12.73	7.96	19.95	11.81
Correlation coefficient (r)	GY	0.202	-0.114	0.569	-0.435	-0.595
	GPY	0.231	0.491	0.577	0.17	-0.218
	GPC	-0.249	-0.348	0.419	-0.607	—
	GNC	-0.199	-0.372	0.126	-0.538	0.564
GY = grain yield
GPY = grain protein yield
GPC = grain protein concentration
GNC = grain nitrogen concentration
N = nitrogen
N_app = nitrogen application rate
