# Supplementary material for: How Does the Environment Affect Wheat Yield and Protein Content Response to Drought? A Meta-Analysis
Source: Front Plant Sci. 2022 Jun 30;13:896985. doi: 10.3389/fpls.2022.896985 (PMC9280411; doi:10.3389/fpls.2022.896985)
Supplement: Supplementary file 3 [file Table_3.xlsx]

## Sheet: Sheet1
Measurement standard	Classification	Data number	CK	Drought	Rate of yield (%)
GY(kg/ha)	—	124	5295.89±496.15	3765.07±618.24	﹣57.32
	TD	57	5452.68±514.61	4391.27±729.37	﹣26.43
	CD	67	5162.51±480.45	3232.34±523.7	﹣83.6
GPY(kg/ha)	—	96	769.423±17.22	584.16±13.01	﹣46.04
GPC(%)	—	125	13.44±0.63	14.67±0.63	9.38
GNC(%)	—	125	2.36±0.11	2.57±0.11	9.27
